# Supplementary material for: Effects of prehospital 12-lead ECG on processes of care and mortality in acute coronary syndrome: a linked cohort study from the Myocardial Ischaemia National Audit Project
Source: PubMed Central journal article supplement — Heart. 2014 Apr 15;100(12):944–50. doi: 10.1136/heartjnl-2013-304599 (PMC4033209; doi:10.1136/heartjnl-2013-304599), 2014-04-15
Supplement: heartjnl-2013-304599-s1.pdf [file heartjnl-2013-304599-s1.pdf]

**Online supplement**

**Treatment of Missing Values**

5 sets of imputations were generated using Fully Conditional Specification with IBM SPSS software, all imputed variables being nominal categorical. The single imputation run simultaneously treated missing values in the following variables: STEMI (yes/no), BMI (<27 or not), PHECG (yes/no), camebyambulace (yes/no), age (<75 or not), previous MI (yes/no), previous angina (yes/no), previous hypertension (yes/no), raised lipid level (yes/no), peripheral arterial disease (yes/no), prior stroke (yes/no), COPD (yes/no), chronic renal failure (yes/no), prior CHF (yes/no), whether seen by a consultant (yes/no), prior PCI (yes/no), prior CABG (yes/no), diabetic (yes/no), current smoker (yes/no), terciles of probability of dying within 30 days, race (white, Asian, other), quartiles of IMDrank, quartiles of blood pressure, quartiles of heart rate, delay in getting treatment (in upper quartile or not).

The following (partly imputed, see first paragraph above) covariates were used for adjustment for all odds ratio calculations in Table 1: IMDrank category, age category, BMI category, year category (5 levels).

The following (partly imputed, see first paragraph above) covariates were used for adjustment for all odds ratio calculations in Table 2: IMDrank category, age category, blood pressure, heart rate, year category (5 levels).

The following (partly imputed, see first paragraph above) covariates were used for adjustment for all odds ratio calculations in Table 5: IMDrank category, age category, diabetic, current smoker, sex, delay, previous MI, previous angina, COPD, blood pressure, heart rate, lipid level, hypertension, prior PCI, prior CABG, prior stroke, peripheral arterial disease.

The following (partly imputed, see first paragraph above) covariates were used for adjustment for all odds ratio calculations in Table 6a: IMDrank category, age category, diabetic, current smoker, sex, delay, previous MI, previous angina, COPD, blood pressure, heart rate, lipid level, hypertension, prior PCI, prior CABG, prior stroke, peripheral arterial disease.

**heartjnl-2013-304599.R1 - Effects of pre-hospital 12 lead electrocardiogram on processes of care and mortality in acute coronary syndrome: A linked cohort study from the Myocardial Ischaemia National Audit Project.**

**Online supplement**

The following (partly imputed, see first paragraph above) covariates were used for adjustment for all odds ratio calculations when comparing PHECG use between the years 2005 and 2009: : IMDrank category, age category, blood pressure, heart rate, sex, BMI.
